# Supplementary material for: Quantitative characterization of the long-term charge storage of a ZnO-based nanorod array film through persistent photoconductance
Source: Royal Society of Chemistry journal article supplement (doi:10.1039/c8ra02318b), 2018-01-01
Supplement: c8ra02318b1.pdf [file c8ra02318b1.pdf]

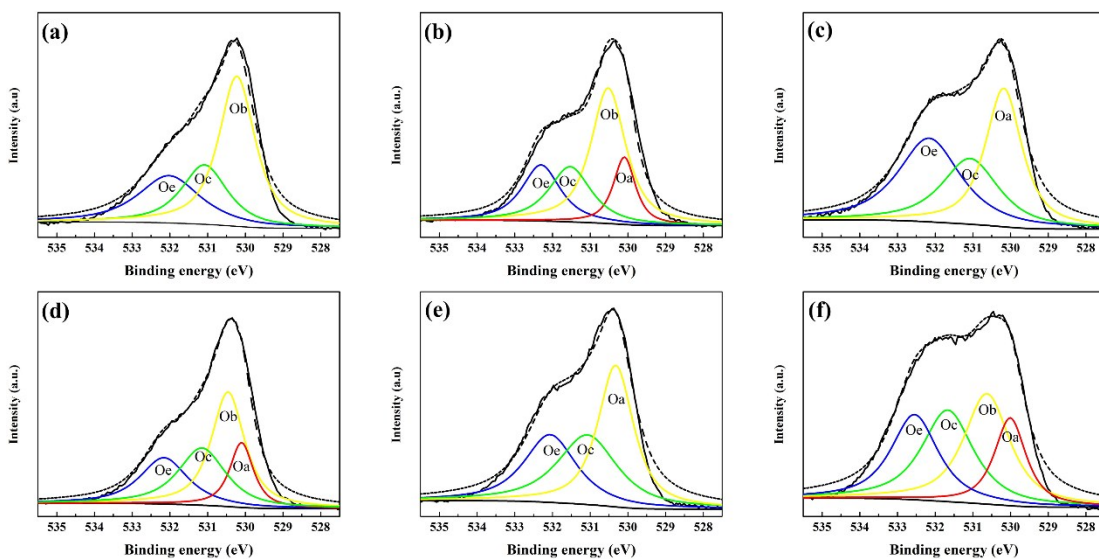

Fig. S1 XPS spectra of O 1s core level of (a)-(c): pure ZnO nanorods annealed at 400, 500, 600°C respectively; (d)-(e): Cu(CH<sub>3</sub>COO)<sub>2</sub>-coated ZnO nanorods annealed at 400, 500, 400°C respectively.

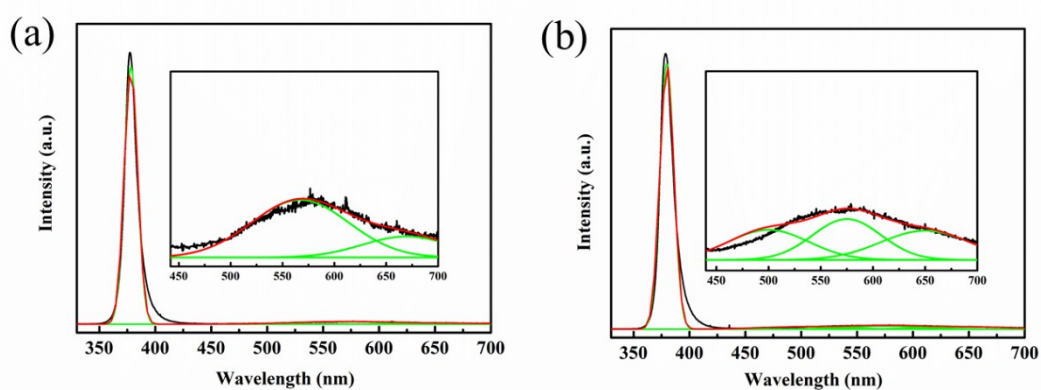

Fig. S2 PL spectra of samples annealed at 400°C: (a) pure ZnO nanorods; (b) Cu(CH<sub>3</sub>COO)<sub>2</sub>-coated ZnO nanorods.

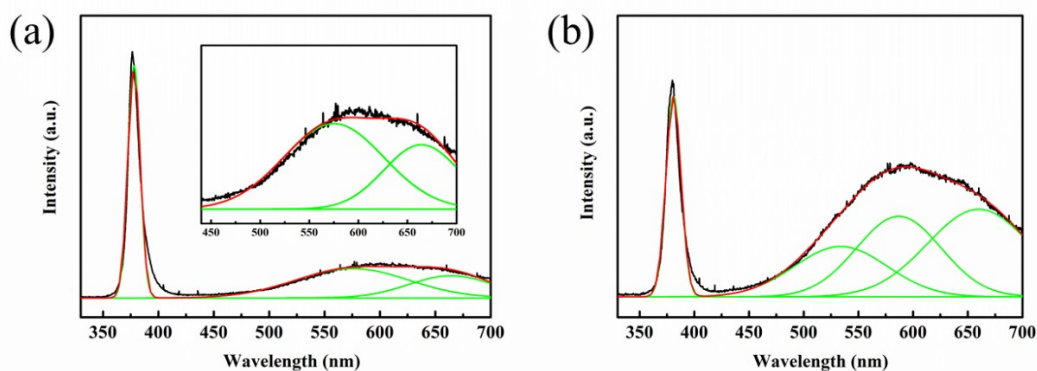

Fig. S3 PL spectra of samples annealed at 500°C: (a) pure ZnO nanorods; (b) Cu(CH<sub>3</sub>COO)<sub>2</sub>-coated ZnO nanorods.

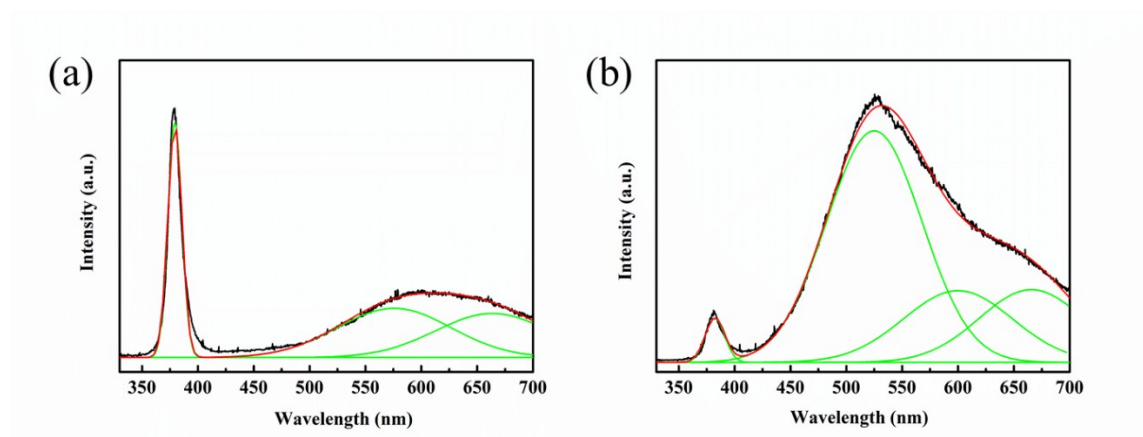

Fig. S4 PL spectra of samples annealed at 600°C: (a) pure ZnO nanorods; (b)  $\text{Cu}(\text{CH}_3\text{CO})_2$ -coated ZnO nanorods.
